# Supplementary material for: Draft genome sequence of Wickerhamomyces anomalus LBCM1105, isolated from cachaça fermentation
Source: PubMed Central journal article supplement (PMC7278976; doi:10.1590/1678-4685-gmb-2019-0122), 2020-06-08
Supplement: 1415-4757-GMB-43-3-e20190122-suppl2.pdf [file 1415-4757-GMB-43-3-e20190122-suppl2.pdf]

**Supplementary material to “Draft genome sequence of  
*Wickerhamomyces anomalus* LBCM1105, isolated from cachaça  
fermentation”**

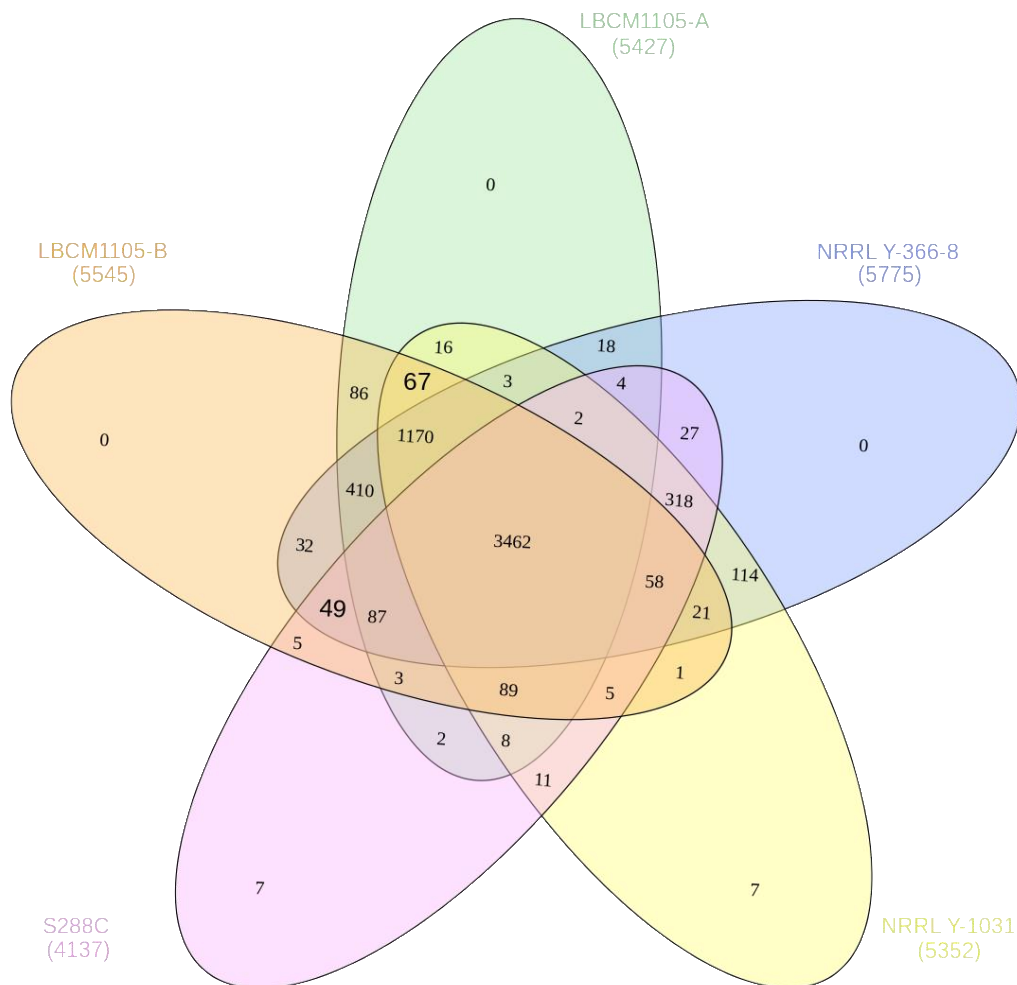

**Figure S2** - Venn Diagram of Groups of Orthologous Genes between *W. anomalus* LBCM1105 (LBCM1105-A: Augustus, LBCM1105-B: BRAKER2), *W. anomalus* NRRL Y-366-8, *W. ciferrii* NRRL Y-1031 and *S. cerevisiae* S288c.
